# Supplementary material for: Application of Convolutional Neural Networks Using Action Potential Shape for In-Silico Proarrhythmic Risk Assessment
Source: MDPI journal article supplement (doi:10.3390/biomedicines11020406), 2023-01-30
Supplement: s1 [file s1]

Supplementary Table S2. qNet and APD90 according to the Cmax values of 16-test drugs

| class | drug_name  | risk_level     | cmax  | qNet   |          |          |          |          | APD90     |         |         |         |         |         |            |
|-------|------------|----------------|-------|--------|----------|----------|----------|----------|-----------|---------|---------|---------|---------|---------|------------|
| 0     | validation | ibutilide      | high  | 100    | Cmax1    | Cmax2    | Cmax3    | Cmax4    | Average   |         | Cmax1   | Cmax2   | Cmax3   | Cmax4   | Average    |
|       |            |                |       | mean   | 0.003938 | -0.01852 | -0.02148 | -0.02367 | -0.014934 | median  | 724.796 | -8.764  | -8.764  | -8.961  | -8.764     |
|       |            |                |       | median | 0.007265 | -0.02007 | -0.01971 | -0.02004 | -0.019877 | min     | 584.792 | 667.379 | 730.302 | 796.174 | 584.792    |
|       |            |                |       | min    | -0.028   | -0.10518 | -0.1056  | -0.10579 | -0.105786 | max     | -       | -       | -       | -       | -          |
|       |            |                |       | max    | 0.01707  | 0.008545 | 0.003171 | -0.01873 | 0.01707   | max-min | -       | -       | -       | -       | -          |
| 1     | validation | azimilide      | high  | 70     | Cmax1    | Cmax2    | Cmax3    | Cmax4    | Average   |         | Cmax1   | Cmax2   | Cmax3   | Cmax4   | Average    |
|       |            |                |       | mean   | 0.056593 | 0.054269 | 0.052327 | 0.059554 | 0.0556857 | median  | 332.116 | 345.291 | 359.055 | 369.28  | 352.173    |
|       |            |                |       | median | 0.056619 | 0.054221 | 0.05229  | 0.059564 | 0.0554198 | min     | 314.223 | 319.728 | 328.38  | 336.049 | 314.223    |
|       |            |                |       | min    | 0.051735 | 0.04927  | 0.047355 | 0.055297 | 0.047355  | max     | 355.123 | 372.82  | 387.174 | 399.955 | 399.955    |
|       |            |                |       | max    | 0.061659 | 0.059668 | 0.057707 | 0.063574 | 0.063574  | max-min | 40.9    | 53.092  | 58.794  | 63.906  | 54.173     |
| 2     | validation | disopyramide   | high  | 742    | Cmax1    | Cmax2    | Cmax3    | Cmax4    | Average   |         | Cmax1   | Cmax2   | Cmax3   | Cmax4   | Average    |
|       |            |                |       | mean   | 0.059816 | 0.057988 | 0.056358 | 0.061922 | 0.0590213 | median  | 322.678 | 331.919 | 324.447 | 351.78  | 328.183    |
|       |            |                |       | median | 0.059874 | 0.058081 | 0.056411 | 0.061978 | 0.0589775 | min     | 312.453 | 319.138 | 342.341 | 331.33  | 312.453    |
|       |            |                |       | min    | 0.05642  | 0.054498 | 0.052719 | 0.05895  | 0.052719  | max     | 335.459 | 352.369 | 362.791 | 372.23  | 372.23     |
|       |            |                |       | max    | 0.062913 | 0.061717 | 0.060488 | 0.064259 | 0.064259  | max-min | 23.006  | 33.231  | 20.45   | 40.9    | 29.39675   |
| 3     | validation | vandetanib     | high  | 255.4  | Cmax1    | Cmax2    | Cmax3    | Cmax4    | Average   |         | Cmax1   | Cmax2   | Cmax3   | Cmax4   | Average    |
|       |            |                |       | mean   | 0.025687 | 0.041623 | 0.033578 | 0.028869 | 0.0324392 | median  | 425.714 | 476.052 | 513.413 | 540.549 | 494.7325   |
|       |            |                |       | median | 0.0258   | 0.0416   | 0.033537 | 0.028909 | 0.0312228 | min     | 394.646 | 437.709 | 469.957 | 494.536 | 394.646    |
|       |            |                |       | min    | 0.017533 | 0.037004 | 0.027228 | 0.021361 | 0.017533  | max     | 453.833 | 527.964 | 581.645 | 622.545 | 622.545    |
|       |            |                |       | max    | 0.032405 | 0.045648 | 0.039065 | 0.035142 | 0.045648  | max-min | 59.187  | 90.255  | 111.688 | 128.009 | 97.28475   |
| 4     | validation | risperidone    | inter | 1.81   | Cmax1    | Cmax2    | Cmax3    | Cmax4    | Average   |         | Cmax1   | Cmax2   | Cmax3   | Cmax4   | Average    |
|       |            |                |       | mean   | 0.062752 | 0.061771 | 0.060975 | 0.060282 | 0.0614449 | median  | 318.155 | 320.318 | 323.66  | 328.38  | 321.989    |
|       |            |                |       | median | 0.062899 | 0.061869 | 0.06107  | 0.060333 | 0.0614693 | min     | 307.536 | 307.536 | 305.767 | 305.373 | 305.373    |
|       |            |                |       | min    | 0.057751 | 0.05616  | 0.055157 | 0.054375 | 0.054375  | max     | 343.717 | 350.993 | 357.482 | 364.167 | 364.167    |
|       |            |                |       | max    | 0.064809 | 0.064837 | 0.064784 | 0.06472  | 0.064837  | max-min | 36.181  | 43.457  | 51.715  | 58.794  | 47.53675   |
| 5     | validation | domperidone    | inter | 19     | Cmax1    | Cmax2    | Cmax3    | Cmax4    | Average   |         | Cmax1   | Cmax2   | Cmax3   | Cmax4   | Average    |
|       |            |                |       | mean   | 0.06297  | 0.059898 | 0.057309 | 0.0551   | 0.0588194 | median  | 330.543 | 351.583 | 365.15  | 378.915 | 358.3665   |
|       |            |                |       | median | 0.062879 | 0.059786 | 0.05718  | 0.054991 | 0.0584828 | min     | 307.536 | 316.188 | 326.807 | 335.459 | 307.536    |
|       |            |                |       | min    | 0.059113 | 0.055658 | 0.052976 | 0.050829 | 0.050829  | max     | 350.993 | 374.589 | 391.303 | 406.444 | 406.444    |
|       |            |                |       | max    | 0.067835 | 0.065413 | 0.063107 | 0.061205 | 0.067835  | max-min | 43.457  | 58.401  | 64.496  | 70.985  | 59.33475   |
| 6     | validation | clarithromycin | inter | 1206   | Cmax1    | Cmax2    | Cmax3    | Cmax4    | Average   |         | Cmax1   | Cmax2   | Cmax3   | Cmax4   | Average    |
|       |            |                |       | mean   | 0.062995 | 0.062163 | 0.061502 | 0.060934 | 0.0618985 | median  | 315.402 | 318.942 | 323.661 | 328.38  | 321.3015   |
|       |            |                |       | median | 0.063062 | 0.062214 | 0.061558 | 0.060981 | 0.061886  | min     | 307.733 | 308.717 | 310.88  | 313.043 | 307.733    |
|       |            |                |       | min    | 0.061283 | 0.059949 | 0.058927 | 0.058072 | 0.058072  | max     | 328.183 | 334.279 | 341.555 | 346.274 | 346.274    |
|       |            |                |       | max    | 0.064744 | 0.064625 | 0.064458 | 0.064316 | 0.064744  | max-min | 20.45   | 25.562  | 30.675  | 33.231  | 27.4795    |
| 7     | validation | astemizole     | inter | 0.26   | Cmax1    | Cmax2    | Cmax3    | Cmax4    | Average   |         | Cmax1   | Cmax2   | Cmax3   | Cmax4   | Average    |
|       |            |                |       | mean   | 0.059275 | 0.057204 | 0.055685 | 0.054455 | 0.0566546 | median  | 330.018 | 340.638 | 348.702 | 353.815 | 344.67     |
|       |            |                |       | median | 0.059267 | 0.057245 | 0.055676 | 0.054449 | 0.0564603 | min     | 317.234 | 322.741 | 328.248 | 331.591 | 317.234    |
|       |            |                |       | min    | 0.055133 | 0.052848 | 0.051333 | 0.050122 | 0.050122  | max     | 350.472 | 363.649 | 371.712 | 376.826 | 376.826    |
|       |            |                |       | max    | 0.06257  | 0.061105 | 0.059827 | 0.058923 | 0.06257   | max-min | 33.238  | 40.908  | 43.464  | 45.235  | 40.71125   |
| 8     | validation | droperidol     | inter | 6.33   | Cmax1    | Cmax2    | Cmax3    | Cmax4    | Average   |         | Cmax1   | Cmax2   | Cmax3   | Cmax4   | Average    |
|       |            |                |       | mean   | 0.055192 | 0.051062 | 0.047409 | 0.059804 | 0.0533668 | median  | 327.2   | 349.223 | 369.28  | 386.977 | 359.2515   |
|       |            |                |       | median | 0.055224 | 0.051013 | 0.047351 | 0.059872 | 0.0531183 | min     | 316.975 | 328.773 | 343.718 | 358.858 | 316.975    |
|       |            |                |       | min    | 0.050234 | 0.045988 | 0.042613 | 0.055755 | 0.042613  | max     | 360.431 | 387.567 | 409.394 | 425.321 | 425.321    |
|       |            |                |       | max    | 0.05961  | 0.056432 | 0.053287 | 0.062526 | 0.062526  | max-min | 43.456  | 58.794  | 65.676  | 66.463  | 58.59725   |
| 9     | validation | pimozide       | inter | 0.431  | Cmax1    | Cmax2    | Cmax3    | Cmax4    | Average   |         | Cmax1   | Cmax2   | Cmax3   | Cmax4   | Average    |
|       |            |                |       | mean   | 0.064149 | 0.063547 | 0.062995 | 0.062479 | 0.0632924 | median  | 311.862 | 316.188 | 319.531 | 321.694 | 317.8595   |
|       |            |                |       | median | 0.064204 | 0.063583 | 0.063039 | 0.06252  | 0.0633108 | min     | 304.194 | 304.194 | 304.194 | 306.357 | 304.194    |
|       |            |                |       | min    | 0.061449 | 0.060213 | 0.059298 | 0.058543 | 0.058543  | max     | 324.644 | 331.526 | 337.425 | 342.144 | 342.144    |
|       |            |                |       | max    | 0.066772 | 0.066864 | 0.06681  | 0.066643 | 0.066864  | max-min | 20.45   | 27.332  | 33.231  | 35.787  | 29.2       |
| 10    | validation | clozapine      | inter | 71     | Cmax1    | Cmax2    | Cmax3    | Cmax4    | Average   |         | Cmax1   | Cmax2   | Cmax3   | Cmax4   | Average    |
|       |            |                |       | mean   | 0.060309 | 0.059088 | 0.058046 | 0.061836 | 0.0598198 | median  | 319.531 | 326.413 | 332.509 | 337.228 | 329.461    |
|       |            |                |       | median | 0.060356 | 0.059131 | 0.058108 | 0.061864 | 0.0597435 | min     | 311.862 | 316.188 | 317.171 | 319.334 | 311.862    |
|       |            |                |       | min    | 0.057878 | 0.056184 | 0.054791 | 0.060031 | 0.054791  | max     | 329.756 | 336.638 | 345.29  | 352.566 | 352.566    |
|       |            |                |       | max    | 0.062281 | 0.061318 | 0.060512 | 0.063348 | 0.063348  | max-min | 17.894  | 20.45   | 28.119  | 33.232  | 24.92375   |
| 11    | validation | metoprolol     | low   | 1800   | Cmax1    | Cmax2    | Cmax3    | Cmax4    | Average   |         | Cmax1   | Cmax2   | Cmax3   | Cmax4   | Average    |
|       |            |                |       | mean   | 0.058032 | 0.053927 | 0.050592 | 0.047752 | 0.0525757 | median  | 330.347 | 346.471 | 356.499 | 369.674 | 351.485    |
|       |            |                |       | median | 0.05802  | 0.05385  | 0.050574 | 0.047792 | 0.052212  | min     | 315.009 | 326.021 | 336.049 | 349.224 | 315.009    |
|       |            |                |       | min    | 0.053864 | 0.048808 | 0.045111 | 0.04214  | 0.04214   | max     | 343.128 | 364.365 | 378.129 | 392.68  | 392.68     |
|       |            |                |       | max    | 0.061488 | 0.058078 | 0.054871 | 0.052159 | 0.061488  | max-min | 28.119  | 38.344  | 42.08   | 43.456  | 37.99975   |
| 12    | validation | tamoxifen      | low   | 21     | Cmax1    | Cmax2    | Cmax3    | Cmax4    | Average   |         | Cmax1   | Cmax2   | Cmax3   | Cmax4   | Average    |
|       |            |                |       | mean   | 0.063938 | 0.063542 | 0.063199 | 0.062888 | 0.0633917 | median  | 309.896 | 312.453 | 315.009 | 316.189 | 313.731    |
|       |            |                |       | median | 0.063969 | 0.063562 | 0.06321  | 0.062897 | 0.0633858 | min     | 307.34  | 307.34  | 307.34  | 308.52  | 307.34     |
|       |            |                |       | min    | 0.062611 | 0.06189  | 0.061262 | 0.060722 | 0.060722  | max     | 317.565 | 322.678 | 325.234 | 328.97  | 328.97     |
|       |            |                |       | max    | 0.064838 | 0.064887 | 0.064891 | 0.064884 | 0.064891  | max-min | 10.225  | 15.338  | 17.894  | 20.45   | 15.97675   |
| 13    | validation | loratadine     | low   | 0.45   | Cmax1    | Cmax2    | Cmax3    | Cmax4    | Average   |         | Cmax1   | Cmax2   | Cmax3   | Cmax4   | Average    |
|       |            |                |       | mean   | 0.064784 | 0.064885 | 0.064964 | 0.06503  | 0.0649156 | median  | 307.2   | 307.2   | 307.2   | 307.2   | 307.2      |
|       |            |                |       | median | 0.064789 | 0.064887 | 0.064959 | 0.065023 | 0.0649228 | min     | 307.201 | 307.201 | 307.201 | 307.201 | 307.201    |
|       |            |                |       | min    | 0.064506 | 0.064499 | 0.064498 | 0.064499 | 0.064498  | max     | 307.202 | 307.202 | 307.202 | 307.202 | 307.202    |
|       |            |                |       | max    | 0.065069 | 0.065241 | 0.065397 | 0.065507 | 0.065507  | max-min | 0.001   | 0.001   | 0.001   | 0.001   | 0.001      |
| 14    | validation | nifedipine     | low   | 7.7    | Cmax1    | Cmax2    | Cmax3    | Cmax4    | Average   |         | Cmax1   | Cmax2   | Cmax3   | Cmax4   | Average    |
|       |            |                |       | mean   | 0.075559 | 0.077225 | 0.078423 | 0.077291 | 0.0760292 | median  | 293.575 | 287.873 | 283.547 | 285.12  | 286.4965</ |
