# Supplementary material for: Application of Convolutional Neural Networks Using Action Potential Shape for In-Silico Proarrhythmic Risk Assessment
Source: MDPI journal article supplement (doi:10.3390/biomedicines11020406), 2023-01-30
Supplement: s1 [file s1]

# Supplementary Figures

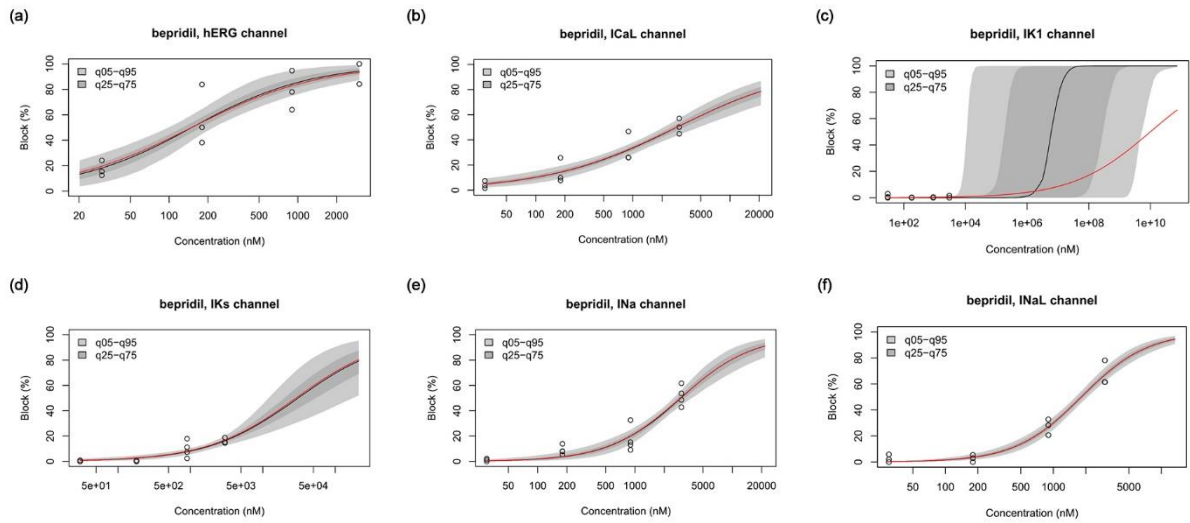

**Supplementary Figure S 1. Hill curves of Bepridil for six ionic current channels**

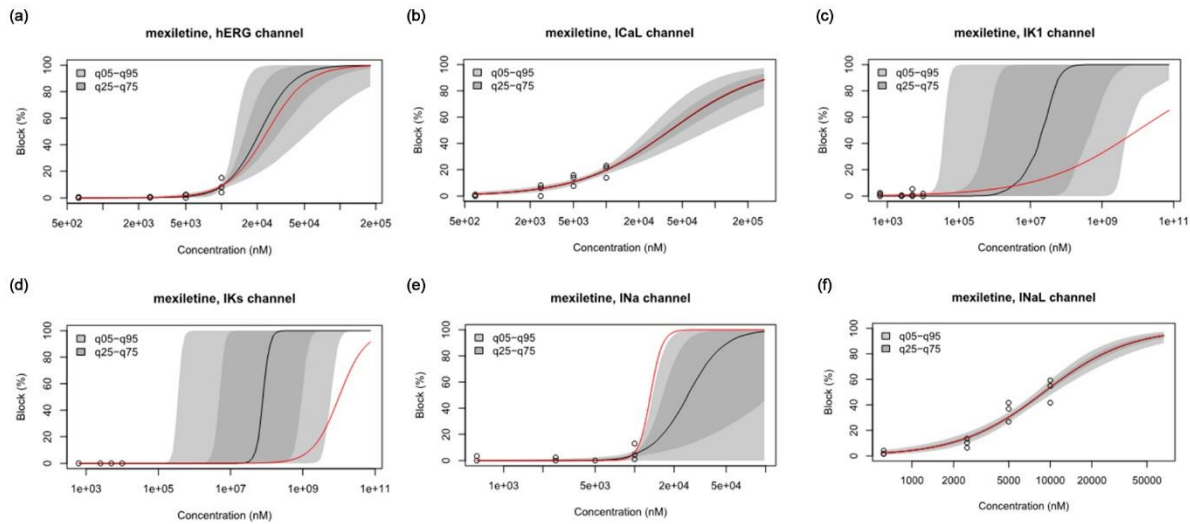

**Supplementary Figure S 2. Hill curves of Mexiletine for six ionic current channels**

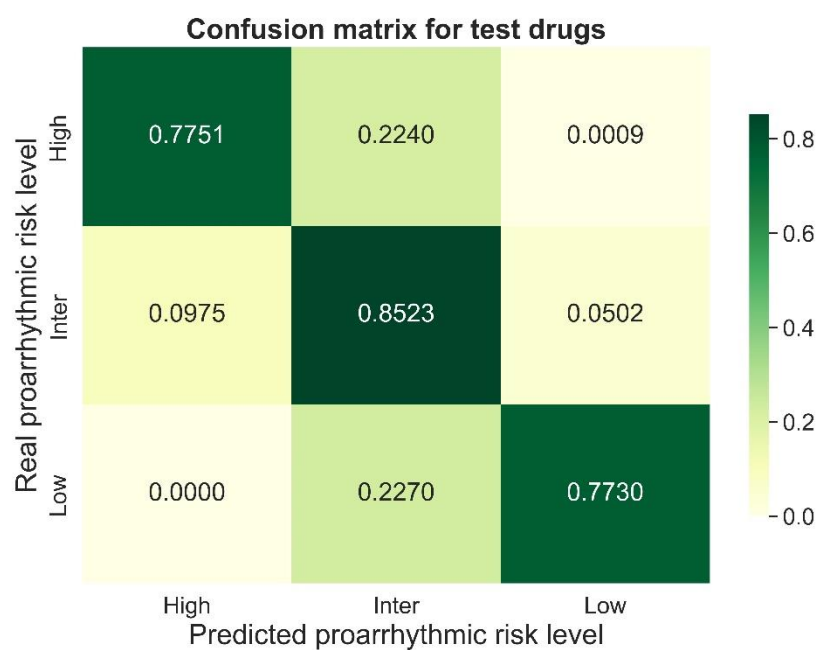

**Supplementary Figure S 3. Normalized confusion matrix of the 10,000-testing results**
