# Supplementary material for: Application of Convolutional Neural Networks Using Action Potential Shape for In-Silico Proarrhythmic Risk Assessment
Source: MDPI journal article supplement (doi:10.3390/biomedicines11020406), 2023-01-30
Supplement: s1 [file s1]

**Supplementary Table S1. qNet and APD90 according to the Cmax values of training drugs**

| class       | drug_name      | risk_level | cmax   | qNet     |          |          |          |           | APD90   |          |         |         |         |          |
|-------------|----------------|------------|--------|----------|----------|----------|----------|-----------|---------|----------|---------|---------|---------|----------|
| 0 training  | quinidine      | high       | 3237   | Cmax1    | Cmax2    | Cmax3    | Cmax4    | Average   |         | Cmax1    | Cmax2   | Cmax3   | Cmax4   | Average  |
|             |                |            | mean   | -0.04756 | -0.01056 | -0.06445 | -0.04953 | -0.043025 | median  | 904.3233 | -       | -       | -       | 904.3233 |
|             |                |            | median | -0.04635 | -0.00148 | -0.05079 | -0.04487 | -0.045612 | min     | 602.0953 | 679.569 | 736.983 | 789.292 | 602.0953 |
|             |                |            | min    | -0.12888 | -0.11514 | -0.13053 | -0.12976 | -0.130532 | max     | -        | -       | -       | -       | -        |
|             |                |            | max    | -0.02591 | 0.019299 | 0.016883 | 0.013808 | 0.019299  | max-min | -        | -       | -       | -       | -        |
| 1 training  | bepridil       | high       | 33     | Cmax1    | Cmax2    | Cmax3    | Cmax4    | Average   |         | Cmax1    | Cmax2   | Cmax3   | Cmax4   | Average  |
|             |                |            | mean   | 0.044326 | 0.056956 | 0.051795 | 0.047698 | 0.0501937 | median  | 344.307  | 371.64  | 392.483 | 413.326 | 382.0615 |
|             |                |            | median | 0.04443  | 0.056908 | 0.051633 | 0.047599 | 0.049616  | min     | 305.964  | 304.784 | 308.127 | 328.97  | 304.784  |
|             |                |            | min    | 0.031718 | 0.045727 | 0.03994  | 0.03526  | 0.031718  | max     | 420.012  | 446.164 | 486.868 | 524.032 | 524.032  |
|             |                |            | max    | 0.060109 | 0.065613 | 0.066038 | 0.065172 | 0.066038  | max-min | 114.048  | 141.38  | 178.741 | 195.062 | 157.3078 |
| 2 training  | dofetilide     | high       | 2      | Cmax1    | Cmax2    | Cmax3    | Cmax4    | Average   |         | Cmax1    | Cmax2   | Cmax3   | Cmax4   | Average  |
|             |                |            | mean   | 0.037598 | 0.030626 | 0.02653  | 0.023829 | 0.0296456 | median  | 444.788  | 489.031 | 519.309 | 542.908 | 504.17   |
|             |                |            | median | 0.037562 | 0.030566 | 0.026516 | 0.023585 | 0.028541  | min     | 420.995  | 459.929 | 476.053 | 465.238 | 420.995  |
|             |                |            | min    | 0.033569 | 0.025208 | 0.019732 | 0.010423 | 0.010423  | max     | 473.89   | 537.599 | 579.679 | 618.613 | 618.613  |
|             |                |            | max    | 0.041207 | 0.035944 | 0.033108 | 0.058825 | 0.058825  | max-min | 52.895   | 77.67   | 103.626 | 153.375 | 96.8915  |
| 3 training  | sotalol        | high       | 14690  | Cmax1    | Cmax2    | Cmax3    | Cmax4    | Average   |         | Cmax1    | Cmax2   | Cmax3   | Cmax4   | Average  |
|             |                |            | mean   | 0.058164 | 0.053381 | 0.062234 | 0.045975 | 0.0549387 | median  | 317.171  | 335.655 | 357.088 | 397.202 | 346.3715 |
|             |                |            | median | 0.058399 | 0.053366 | 0.062433 | 0.045874 | 0.0558825 | min     | 306.356  | 307.536 | 308.52  | 320.515 | 306.356  |
|             |                |            | min    | 0.048595 | 0.043727 | 0.055028 | 0.035916 | 0.035916  | max     | 354.335  | 390.32  | 418.438 | 465.828 | 465.828  |
|             |                |            | max    | 0.0642   | 0.06276  | 0.064527 | 0.05625  | 0.064527  | max-min | 47.979   | 82.784  | 109.918 | 145.313 | 96.4985  |
| 4 training  | chlorpromazine | inter      | 38     | Cmax1    | Cmax2    | Cmax3    | Cmax4    | Average   |         | Cmax1    | Cmax2   | Cmax3   | Cmax4   | Average  |
|             |                |            | mean   | 0.061473 | 0.060755 | 0.063207 | 0.062274 | 0.0619273 | median  | 316.385  | 321.301 | 327.396 | 333.492 | 324.3485 |
|             |                |            | median | 0.061541 | 0.060837 | 0.063309 | 0.062375 | 0.0619578 | min     | 306.16   | 308.52  | 309.503 | 313.042 | 306.16   |
|             |                |            | min    | 0.056601 | 0.055674 | 0.059365 | 0.057687 | 0.055674  | max     | 336.638  | 349.42  | 358.071 | 366.723 | 366.723  |
|             |                |            | max    | 0.065656 | 0.06568  | 0.065235 | 0.065517 | 0.06568   | max-min | 30.478   | 40.9    | 48.568  | 53.681  | 43.40675 |
| 5 training  | cisapride      | inter      | 2.6    | Cmax1    | Cmax2    | Cmax3    | Cmax4    | Average   |         | Cmax1    | Cmax2   | Cmax3   | Cmax4   | Average  |
|             |                |            | mean   | 0.040605 | 0.051623 | 0.046646 | 0.043227 | 0.0455254 | median  | 365.544  | 390.124 | 408.017 | 424.928 | 399.0705 |
|             |                |            | median | 0.040665 | 0.051575 | 0.046583 | 0.043233 | 0.044908  | min     | 337.426  | 364.561 | 379.899 | 391.697 | 337.426  |
|             |                |            | min    | 0.031513 | 0.046008 | 0.040613 | 0.035371 | 0.031513  | max     | 399.365  | 425.911 | 456.783 | 481.166 | 481.166  |
|             |                |            | max    | 0.045949 | 0.05742  | 0.051795 | 0.047959 | 0.05742   | max-min | 61.939   | 61.35   | 76.884  | 89.469  | 72.4105  |
| 6 training  | terfenadine    | inter      | 4      | Cmax1    | Cmax2    | Cmax3    | Cmax4    | Average   |         | Cmax1    | Cmax2   | Cmax3   | Cmax4   | Average  |
|             |                |            | mean   | 0.045279 | 0.043062 | 0.052505 | 0.048197 | 0.0472606 | median  | 364.56   | 387.567 | 403.887 | 416.472 | 395.727  |
|             |                |            | median | 0.045332 | 0.043166 | 0.052486 | 0.048144 | 0.046738  | min     | 323.66   | 344.11  | 365.544 | 380.684 | 323.66   |
|             |                |            | min    | 0.037211 | 0.035277 | 0.044391 | 0.03993  | 0.035277  | max     | 405.46   | 433.383 | 457.569 | 475.266 | 475.266  |
|             |                |            | max    | 0.05244  | 0.049752 | 0.059528 | 0.055632 | 0.059528  | max-min | 81.8     | 89.273  | 92.025  | 94.582  | 89.42    |
| 7 training  | ondansetron    | inter      | 139    | Cmax1    | Cmax2    | Cmax3    | Cmax4    | Average   |         | Cmax1    | Cmax2   | Cmax3   | Cmax4   | Average  |
|             |                |            | mean   | 0.061368 | 0.058742 | 0.056417 | 0.054337 | 0.057716  | median  | 325.43   | 335.852 | 349.026 | 361.611 | 342.439  |
|             |                |            | median | 0.061537 | 0.058799 | 0.056364 | 0.054251 | 0.057581  | min     | 308.126  | 310.289 | 315.795 | 323.267 | 308.126  |
|             |                |            | min    | 0.052377 | 0.04817  | 0.045442 | 0.043399 | 0.043399  | max     | 363.774  | 384.42  | 400.151 | 412.736 | 412.736  |
|             |                |            | max    | 0.065019 | 0.064488 | 0.063386 | 0.061848 | 0.065019  | max-min | 55.648   | 74.131  | 84.356  | 89.469  | 75.901   |
| 8 training  | diltiazem      | low        | 122    | Cmax1    | Cmax2    | Cmax3    | Cmax4    | Average   |         | Cmax1    | Cmax2   | Cmax3   | Cmax4   | Average  |
|             |                |            | mean   | 0.074316 | 0.077043 | 0.078565 | 0.079547 | 0.0773677 | median  | 295.148  | 295.379 | 295.738 | 295.345 | 295.362  |
|             |                |            | median | 0.074331 | 0.077113 | 0.078619 | 0.079636 | 0.0778655 | min     | 284.923  | 280.597 | 278.434 | 277.451 | 277.451  |
|             |                |            | min    | 0.070544 | 0.072914 | 0.073644 | 0.073917 | 0.070544  | max     | 305.373  | 308.716 | 311.076 | 313.239 | 313.239  |
|             |                |            | max    | 0.077622 | 0.08073  | 0.082637 | 0.084194 | 0.084194  | max-min | 20.45    | 28.119  | 32.642  | 35.788  | 29.24975 |
| 9 training  | mexiletine     | low        | 4129   | Cmax1    | Cmax2    | Cmax3    | Cmax4    | Average   |         | Cmax1    | Cmax2   | Cmax3   | Cmax4   | Average  |
|             |                |            | mean   | 0.090527 | 0.080027 | 0.078298 | 0.08916  | 0.084503  | median  | 290.429  | 280.401 | 291.216 | 320.318 | 290.8225 |
|             |                |            | median | 0.09133  | 0.084658 | 0.078266 | 0.089123 | 0.08689   | min     | 282.76   | 267.62  | 265.653 | 98.907  | 98.907   |
|             |                |            | min    | 0.07428  | 0.029776 | 0.074219 | 0.084028 | 0.029776  | max     | 300.654  | 293.182 | 373.016 | 711.817 | 711.817  |
|             |                |            | max    | 0.1019   | 0.106533 | 0.082785 | 0.095506 | 0.106533  | max-min | 17.894   | 25.562  | 107.363 | 612.91  | 190.9323 |
| 10 training | ranolazine     | low        | 1948.2 | Cmax1    | Cmax2    | Cmax3    | Cmax4    | Average   |         | Cmax1    | Cmax2   | Cmax3   | Cmax4   | Average  |
|             |                |            | mean   | 0.063273 | 0.063839 | 0.064386 | 0.064772 | 0.0640675 | median  | 346.47   | 371.246 | 387.764 | 401.921 | 379.505  |
|             |                |            | median | 0.063253 | 0.063887 | 0.064436 | 0.06472  | 0.0641613 | min     | 315.795  | 335.459 | 351.976 | 358.465 | 315.795  |
|             |                |            | min    | 0.057189 | 0.057614 | 0.056927 | 0.055733 | 0.055733  | max     | 373.803  | 401.921 | 428.664 | 450.49  | 450.49   |
|             |                |            | max    | 0.070695 | 0.071565 | 0.071484 | 0.072447 | 0.072447  | max-min | 58.008   | 66.462  | 76.688  | 92.025  | 73.29575 |
| 11 training | verapamil      | low        | 81     | Cmax1    | Cmax2    | Cmax3    | Cmax4    | Average   |         | Cmax1    | Cmax2   | Cmax3   | Cmax4   | Average  |
|             |                |            | mean   | 0.063016 | 0.061071 | 0.059033 | 0.064472 | 0.061898  | median  | 320.515  | 338.408 | 356.302 | 371.836 | 347.355  |
|             |                |            | median | 0.062895 | 0.060857 | 0.058782 | 0.064413 | 0.0618758 | min     | 305.177  | 311.666 | 325.627 | 343.718 | 305.177  |
|             |                |            | min    | 0.058891 | 0.056179 | 0.053796 | 0.060805 | 0.053796  | max     | 348.633  | 366.527 | 379.308 | 399.955 | 399.955  |
|             |                |            | max    | 0.069457 | 0.06863  | 0.067237 | 0.06914  | 0.069457  | max-min | 43.456   | 54.861  | 53.681  | 56.237  | 52.05875 |
